# Supplementary material for: Selection Criteria and Treatment Outcome for Advanced Non-Small Cell Lung Cancer (NSCLC) Patients Unfit for Platinum-Based First-Line Therapy: Results of the MOON-OSS Observational Trial
Source: MDPI journal article supplement (doi:10.3390/cancers14246074), 2022-12-09
Supplement: s1 [file s1]

Supplementary Table S1

| Treatment                        | All grade | Grade 3-4 | Dose delays | Dose reductions |
|----------------------------------|-----------|-----------|-------------|-----------------|
| <b>Gemcitabine</b>               | 63.7%     | 13.6%     | 41%         | 31.8%           |
| <b>Oral standard vinorelbine</b> | 66.7%     | 16.6%     | 16.6%       | 33.3%           |
| <b>Metronomic vinorelbine</b>    | 65.9%     | 8%        | 13.8%       | 17.8%           |
| <b>Others*</b>                   | 71.4%     | 14.3%     | 28.6%       | 28.6%           |

\*Others group (n = 7) consisted of docetaxel and pemetrexed.
